# Supplementary figures and images for: RNA sequence to structure analysis from comprehensive pairwise mutagenesis of multiple self-cleaving ribozymes
Source: eLife journal article supplement (doi:10.7554/elife.80360), 2023-01-19

**CPEB3 C57**

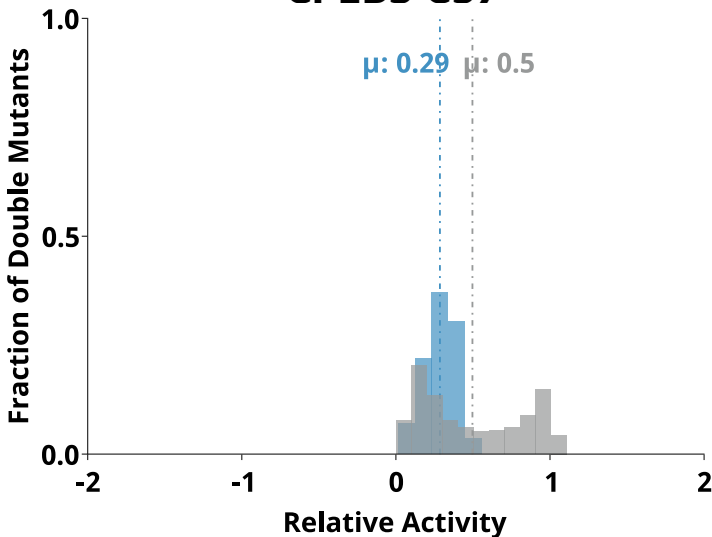

**HDV C75**

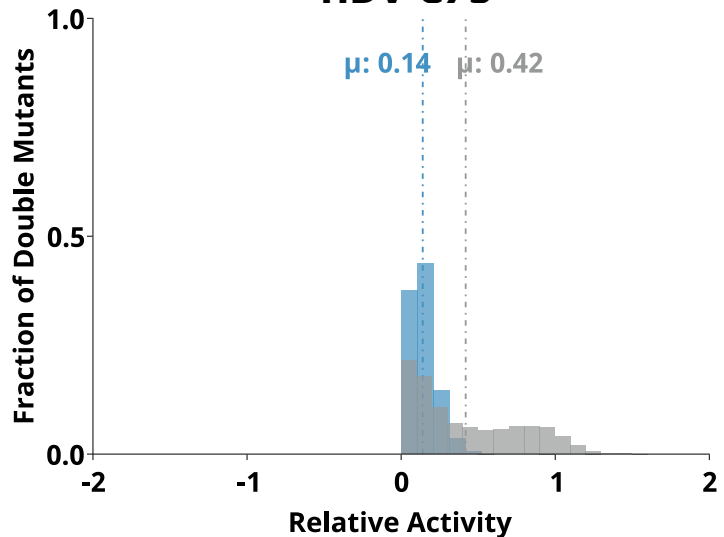

**Twister A1**

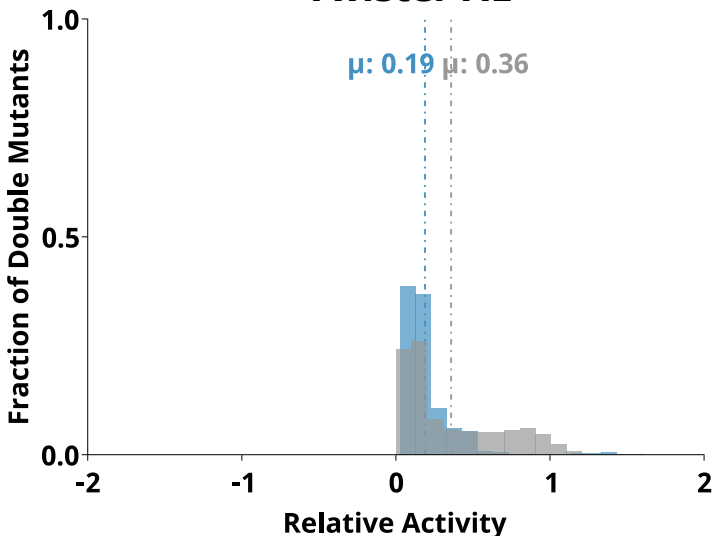

**Twister G39**

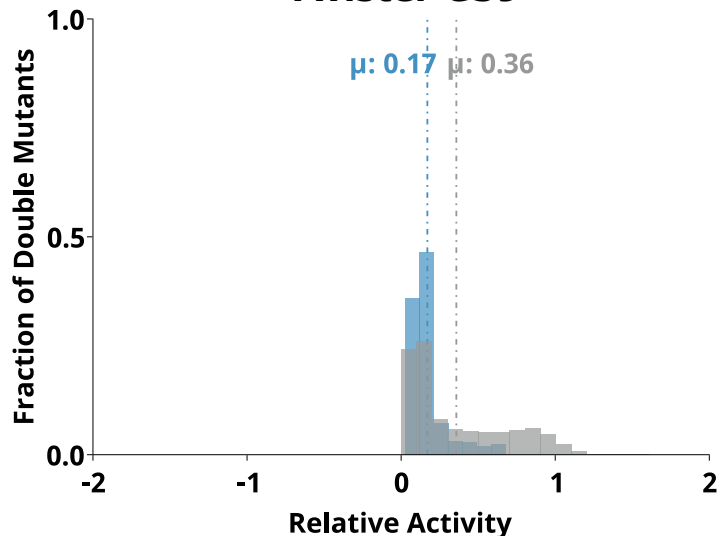

**Hairpin G29**

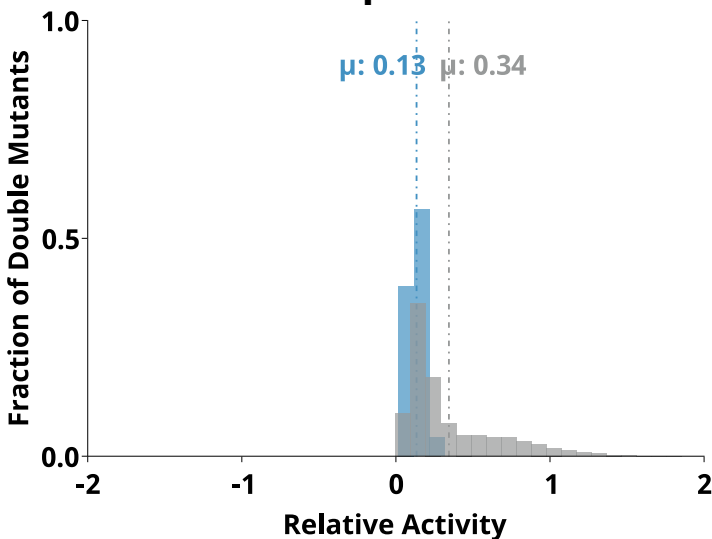

**Hairpin G59**

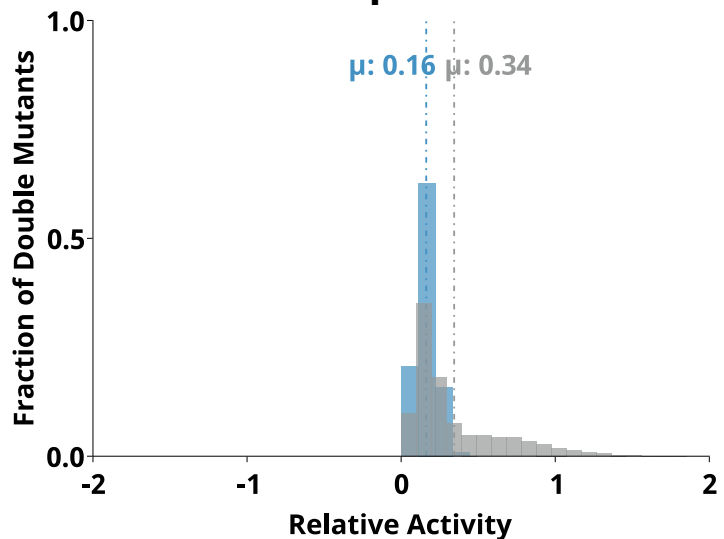

**Hammerhead G25**

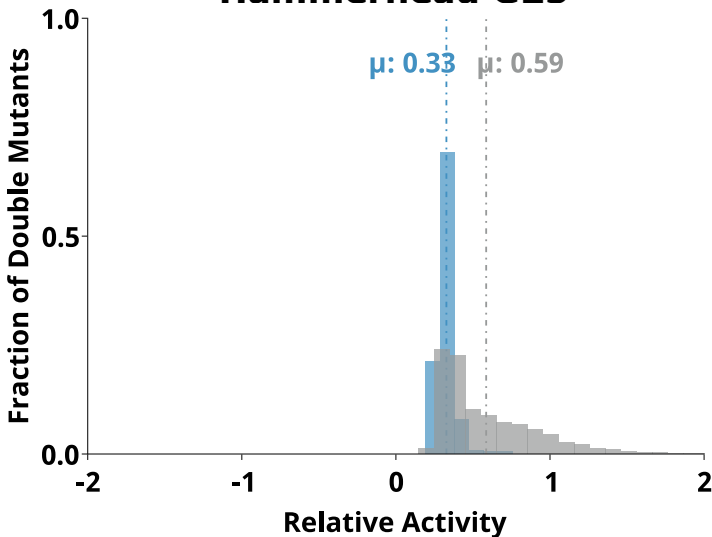

**Hammerhead G39**

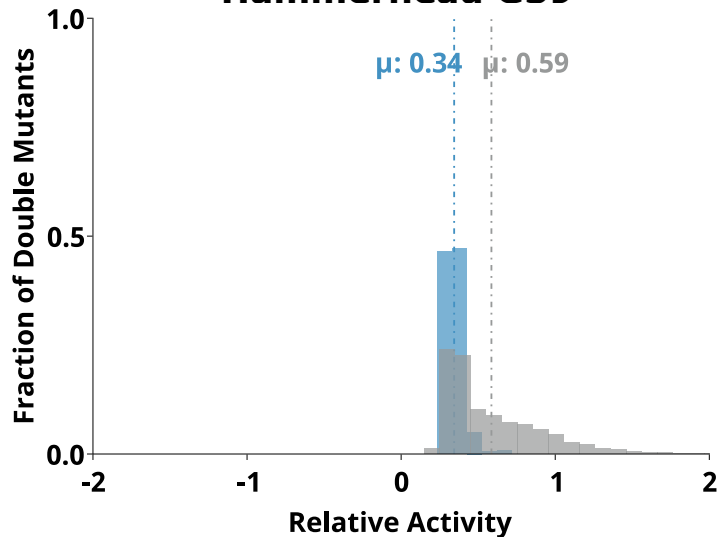

Supplement: supp [file elife-80360-supp-v1.zip]

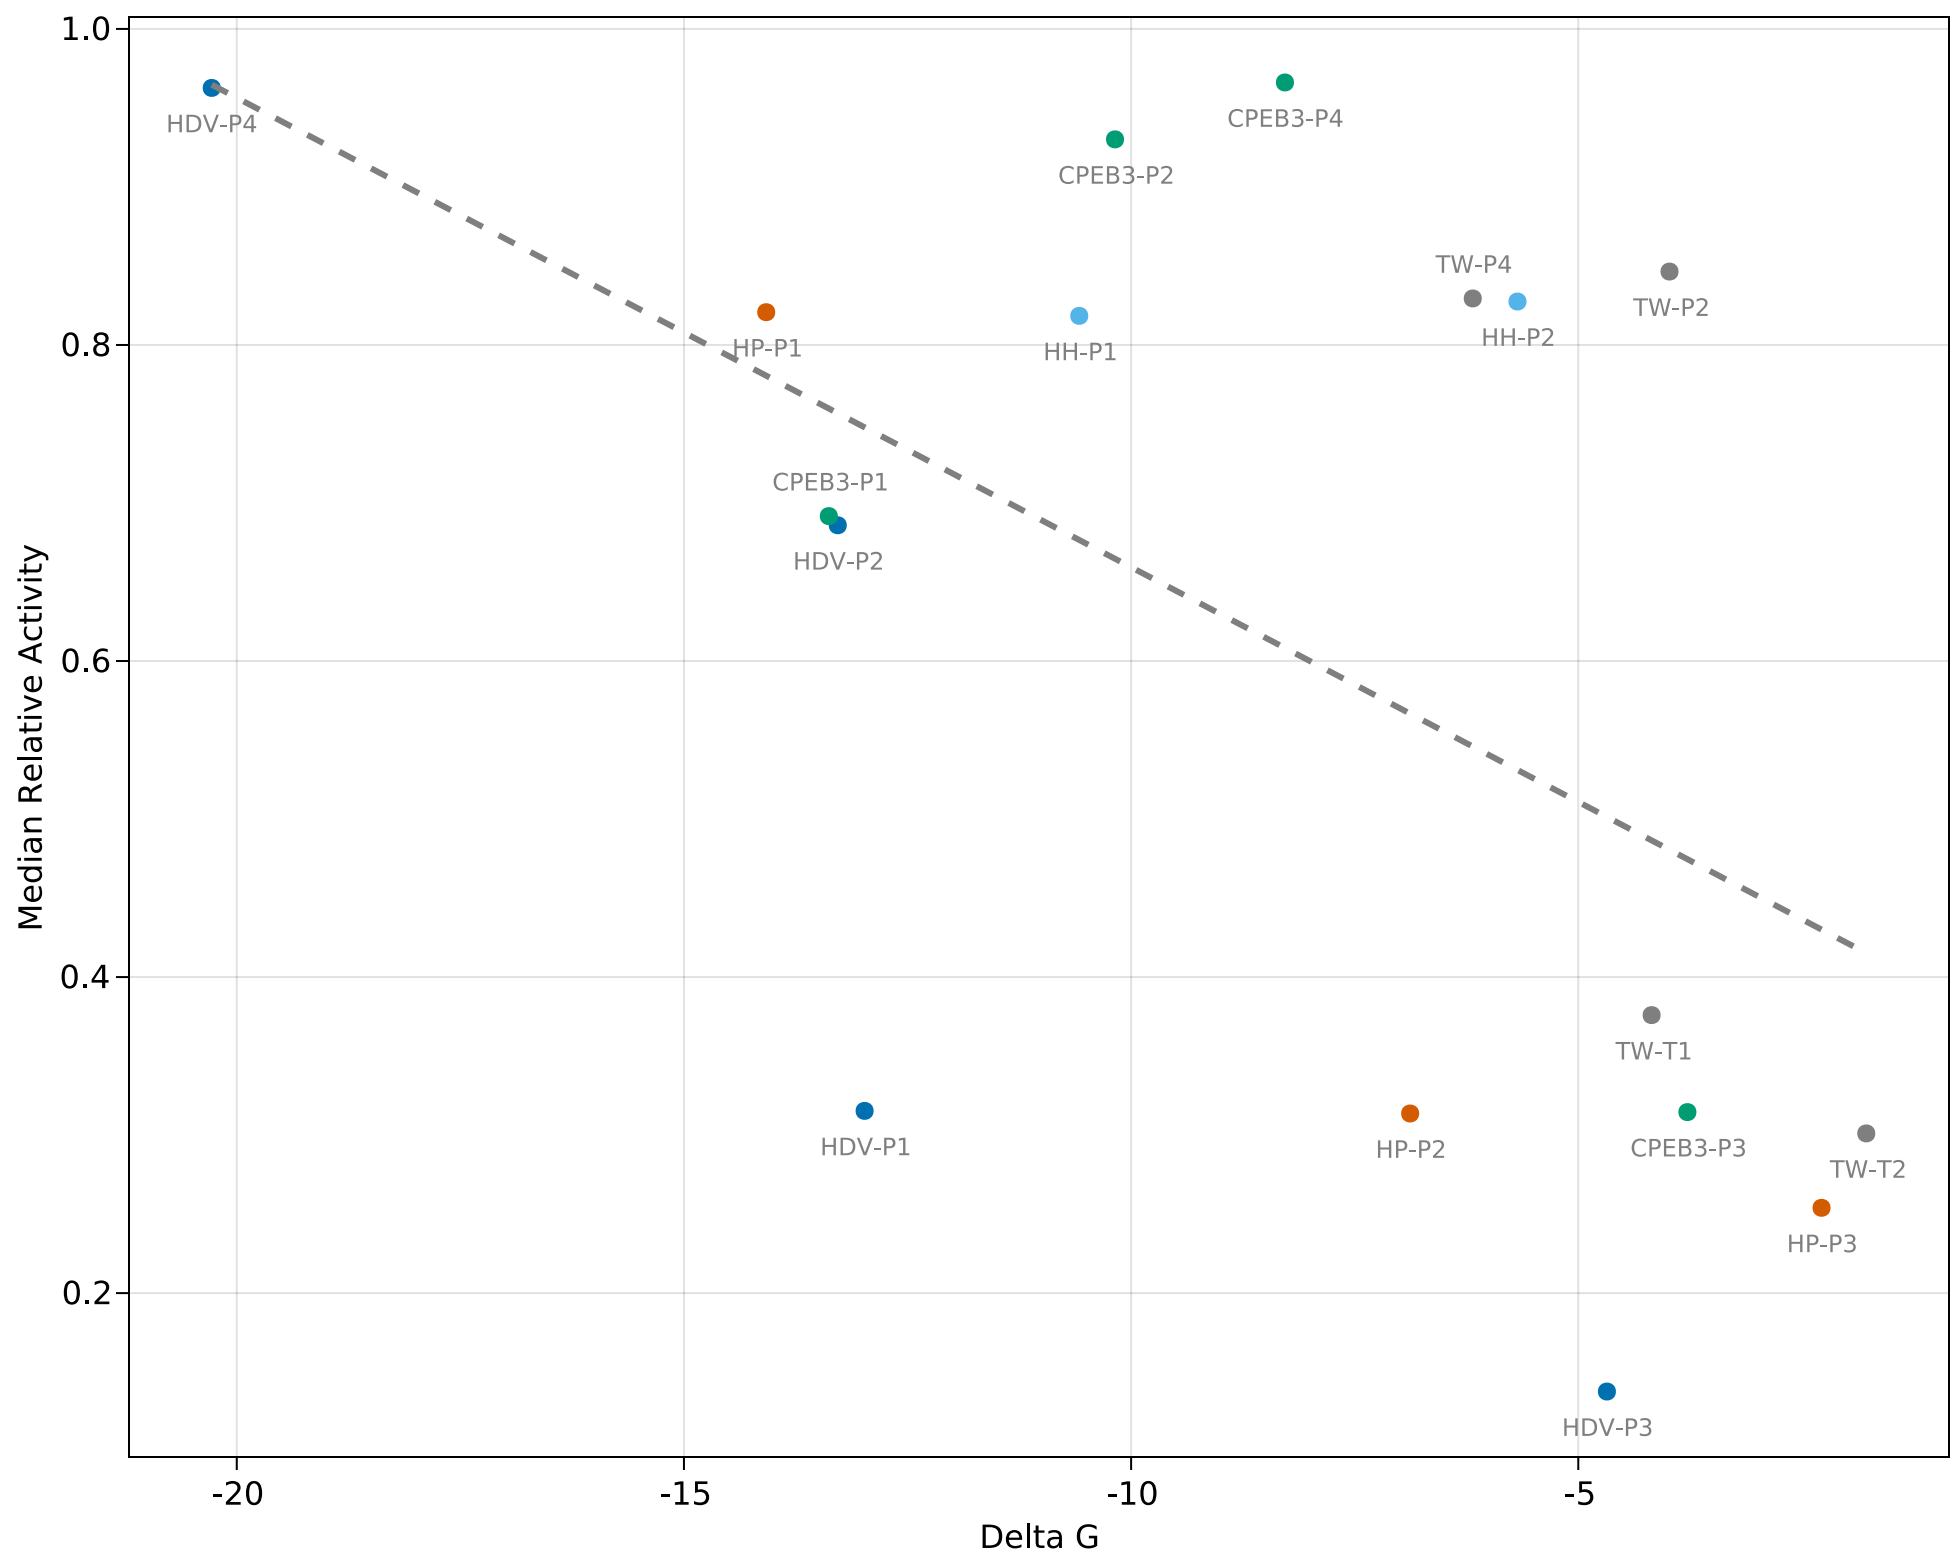

Supplement: supp [file elife-80360-supp-v1.zip]

A

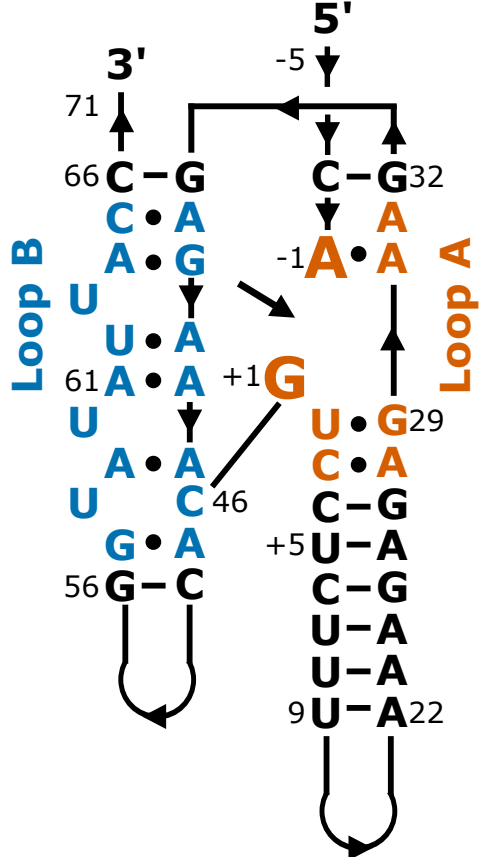

B

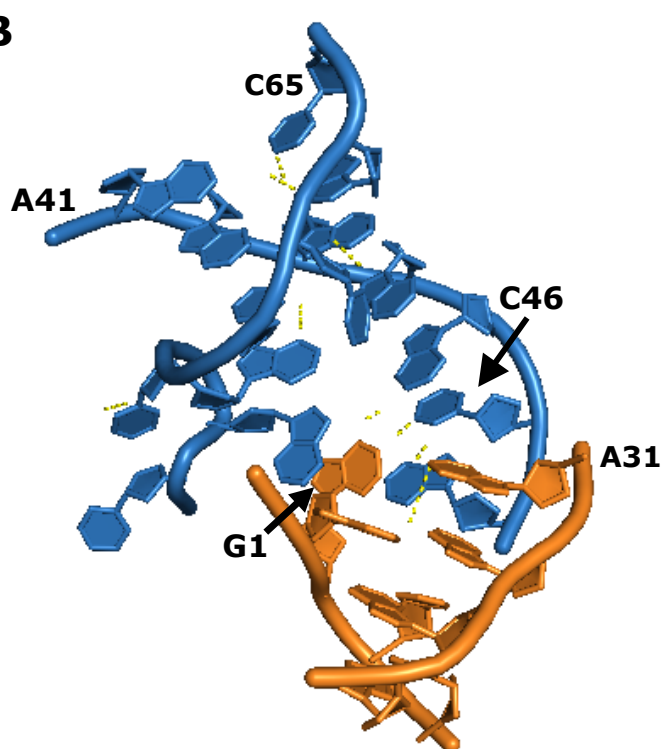

C

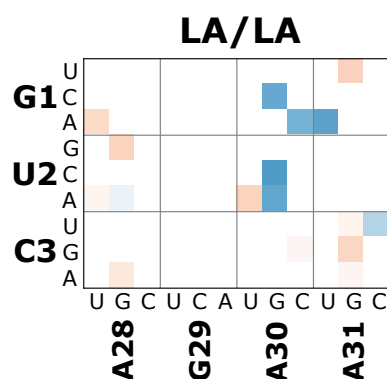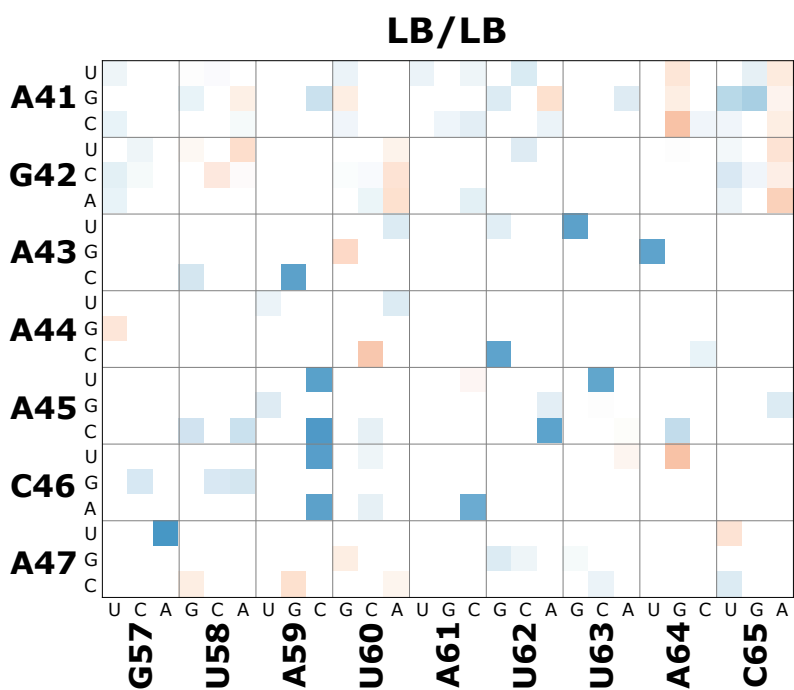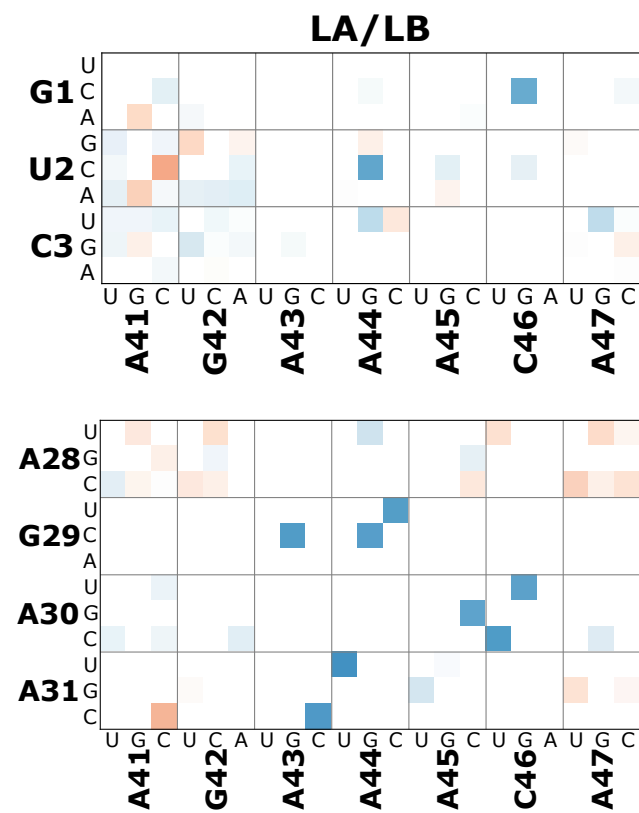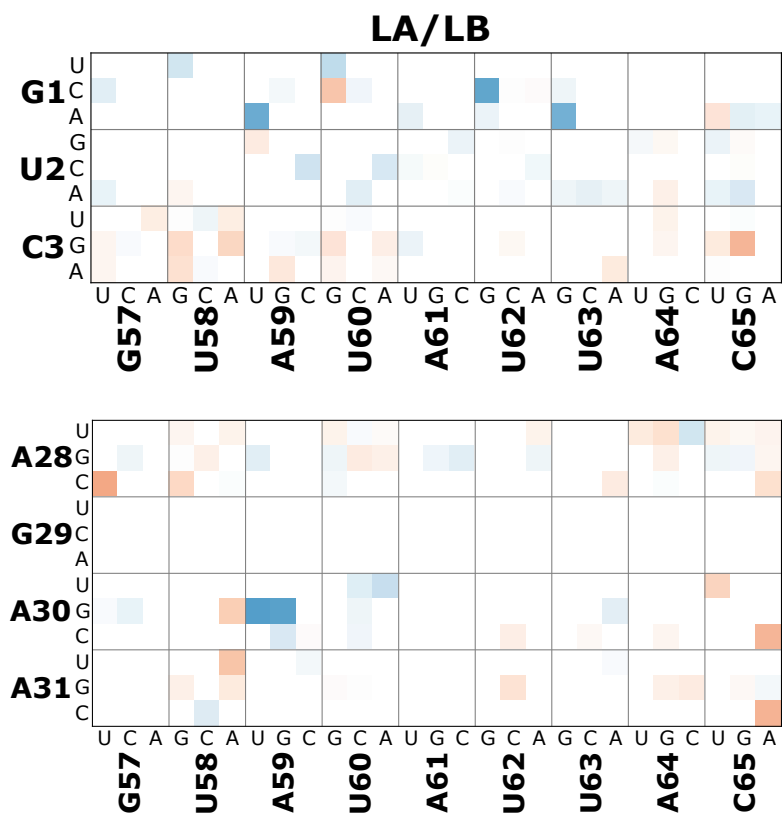

Supplement: supp [file elife-80360-supp-v1.zip]

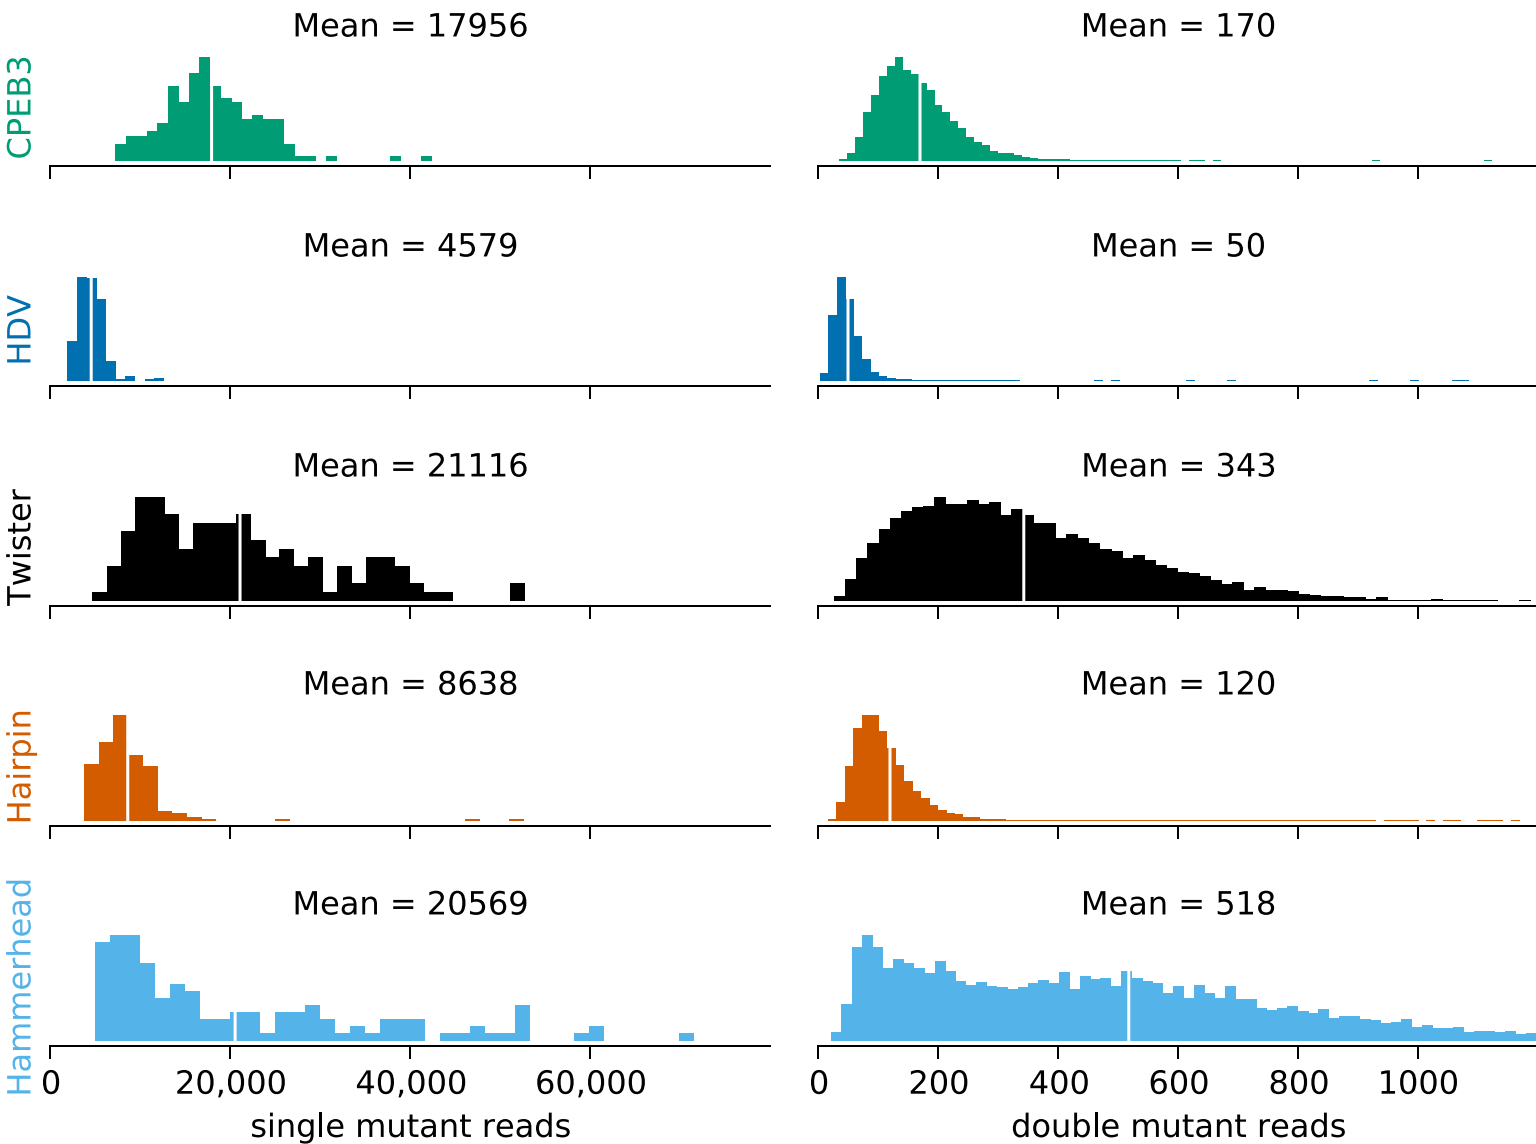

Supplement: supp [file elife-80360-supp-v1.zip]

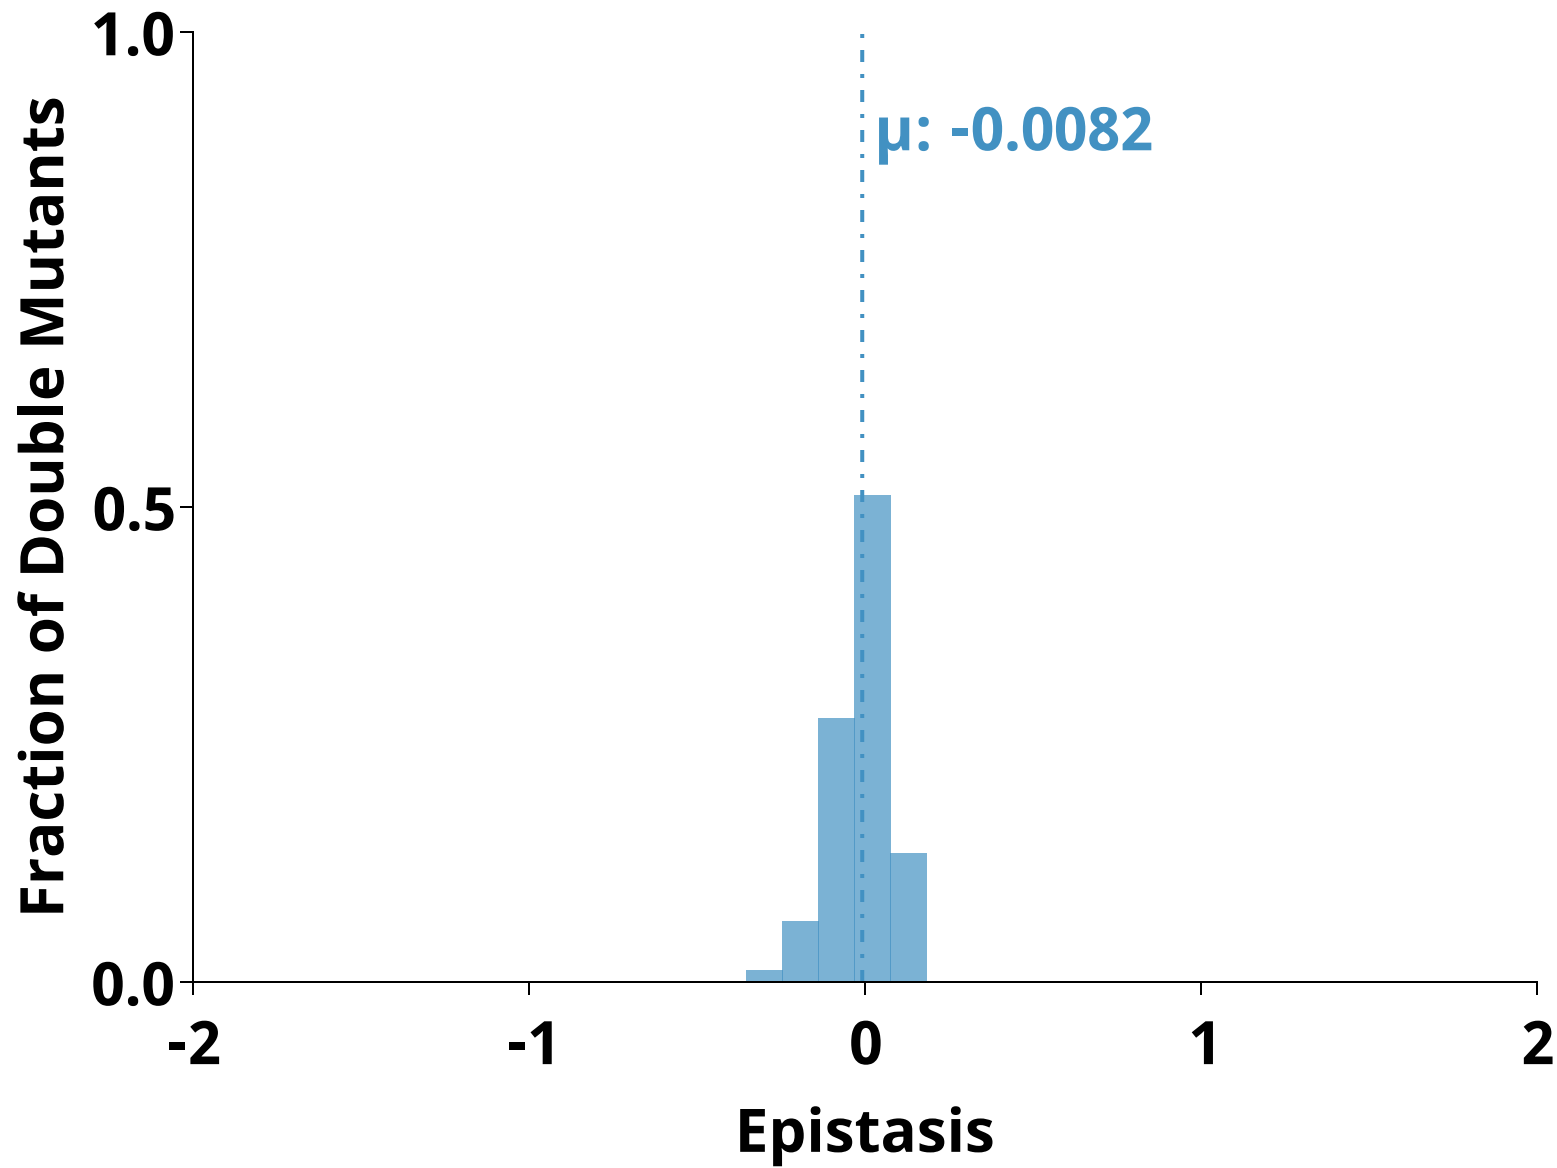

Supplement: supp [file elife-80360-supp-v1.zip]
